# Supplementary material
Source: HighWire-hosted journal article supplement (https://bmjopen.bmj.com/content/7/9/e017567)

What does my neighbourhood have to do with my weight? A protocol for systematic review and meta-analysis of the association between neighbourhood socioeconomic status and body weight.

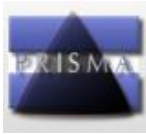

## PRISMA Flow Diagram

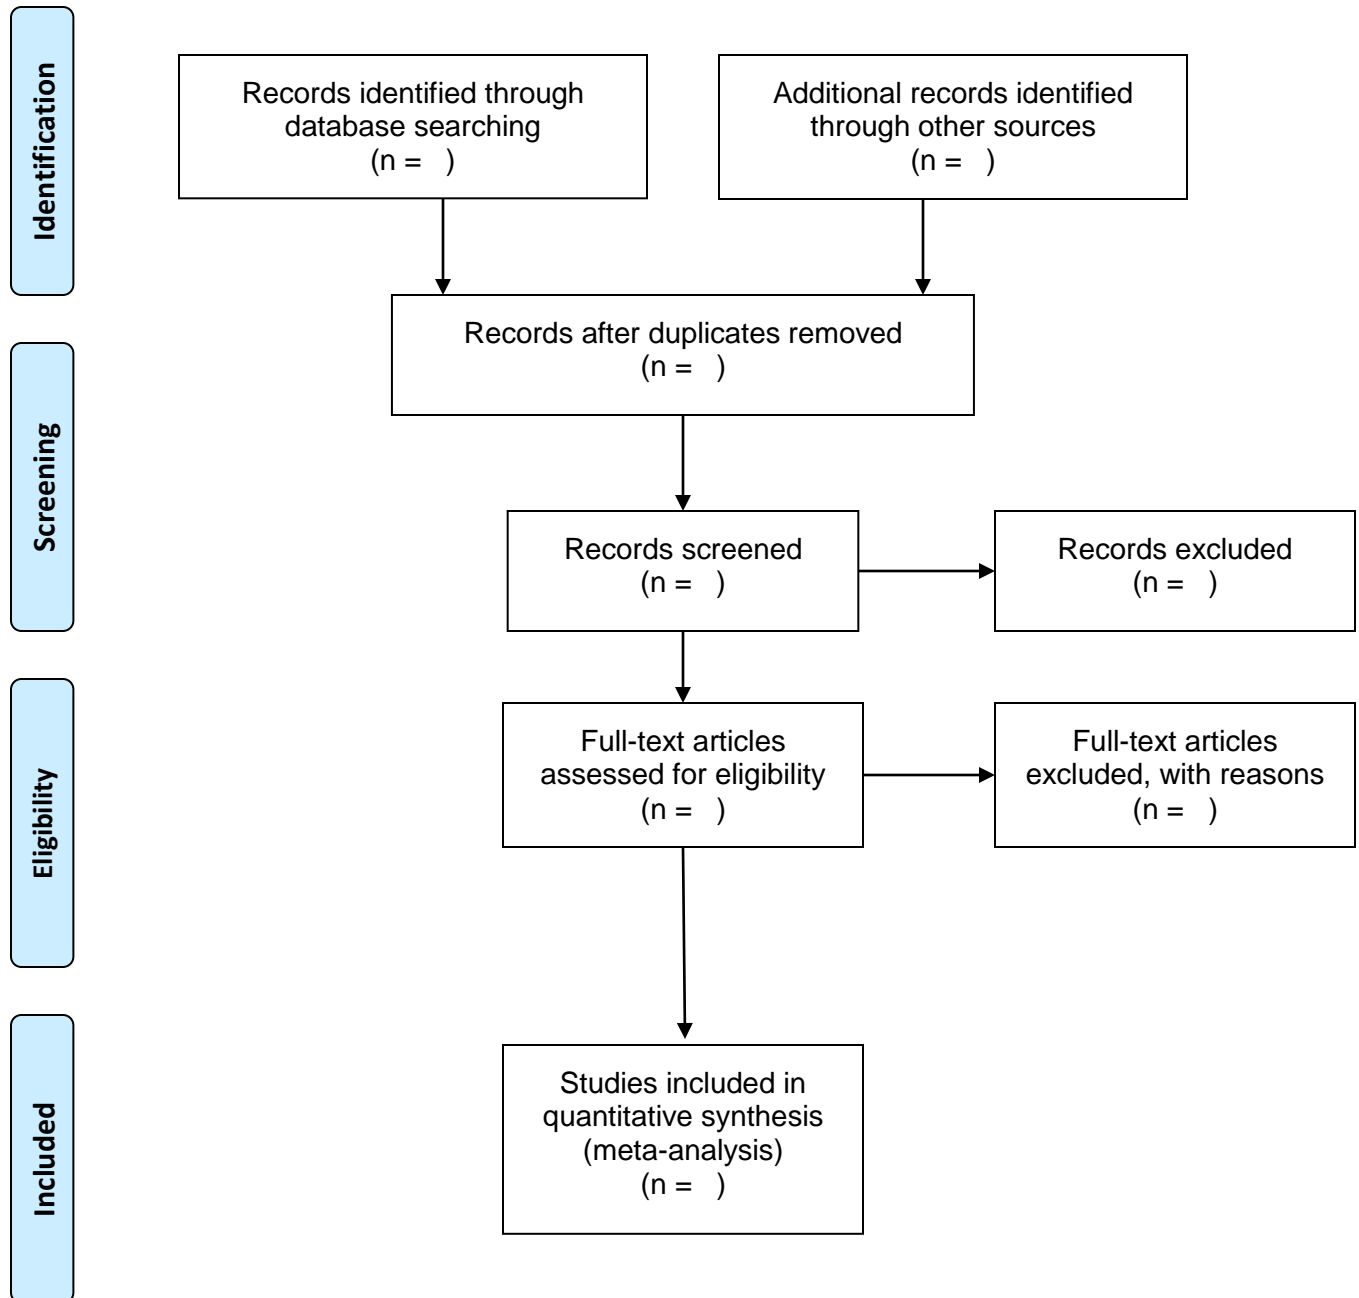

Supplement: inline-supplementary-material-2 [file inline-supplementary-material-2.pdf]
